# Supplementary material
Source: JCI journal article supplement (doi:10.1172/jci136206)
Supplement: sd1 [file 1]

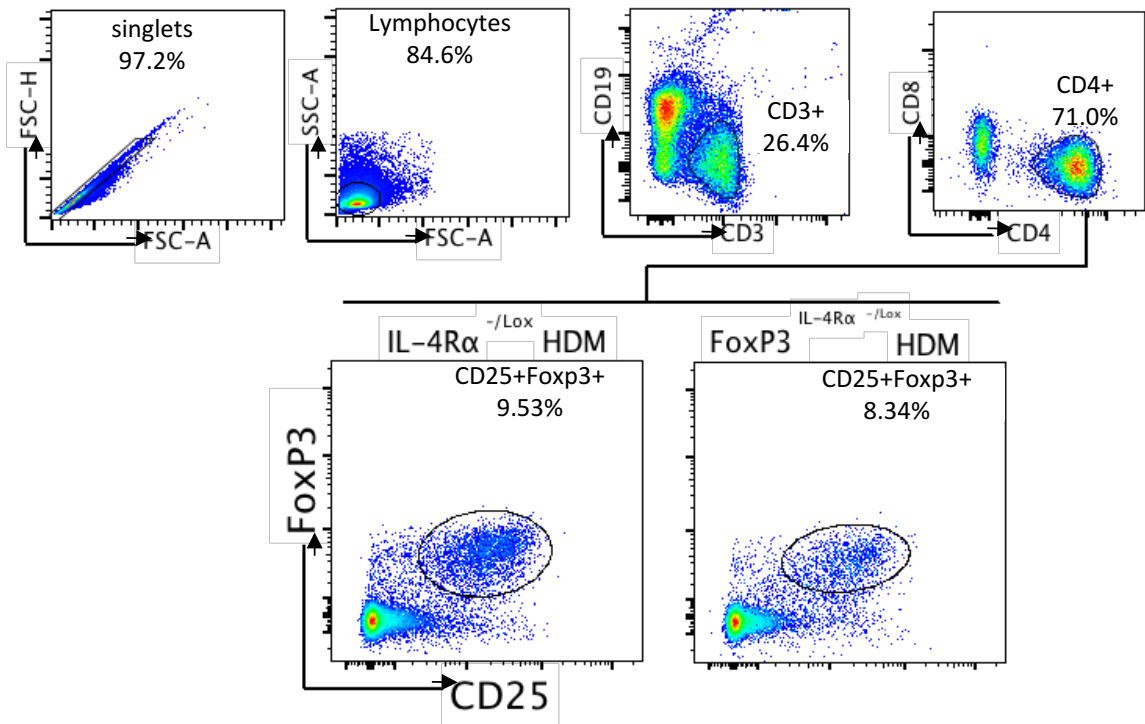

**Supplemental Figure 1. Gating strategy for CD4<sup>+</sup> CD25<sup>+</sup> FoxP3<sup>+</sup> T regulatory cells in both the mLN and lung tissue.**

We counted live cells by trypan blue and excluded dead cells by 7AAD or Qdot605 live/dead stain marker. We excluded doubles and gated on lymphocytes. To get to T reg cells, we surface stained with CD19-CD3<sup>+</sup>, followed by CD4<sup>+</sup>CD8<sup>-</sup>CD25<sup>+</sup>. To detect Foxp3, we fixed the cells and permeabilised with eBioscience Foxp3 kit before staining for intracellular transcriptional factor Foxp3.

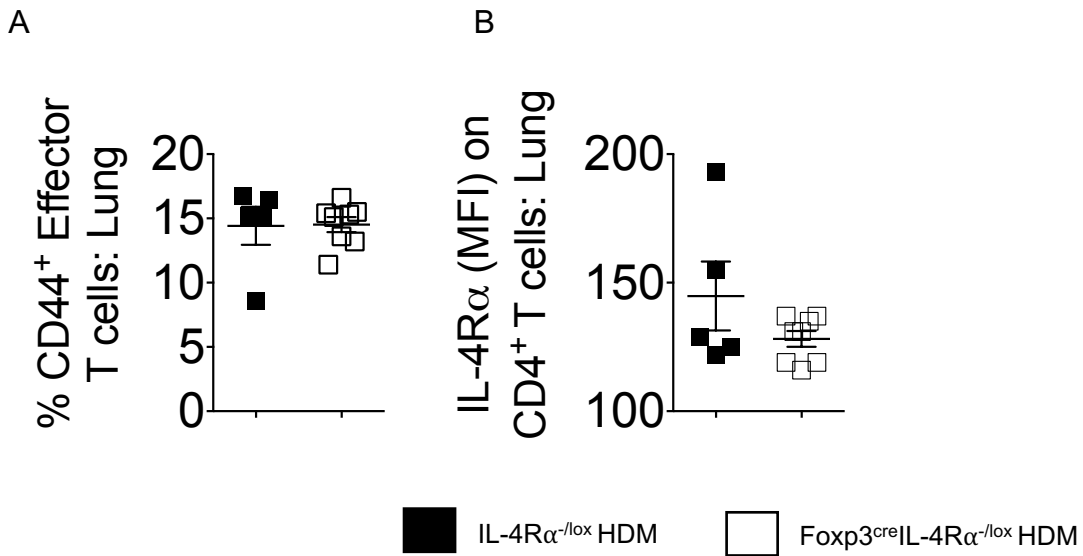

**Supplemental Figure 2. Lung CD4 T cells are not impacted by lack of IL-4R $\alpha$  signalling on T regs.**

(A) Effector phenotype of CD4 T cells (CD3<sup>+</sup>CD4<sup>+</sup>CD44<sup>+</sup>CD62L<sup>-</sup>)

(B) Expression of IL-4R $\alpha$  in lung CD4 T cells (CD3<sup>+</sup>CD4<sup>+</sup>CD44<sup>+</sup>CD62L<sup>-</sup>)

Related to Figure 2

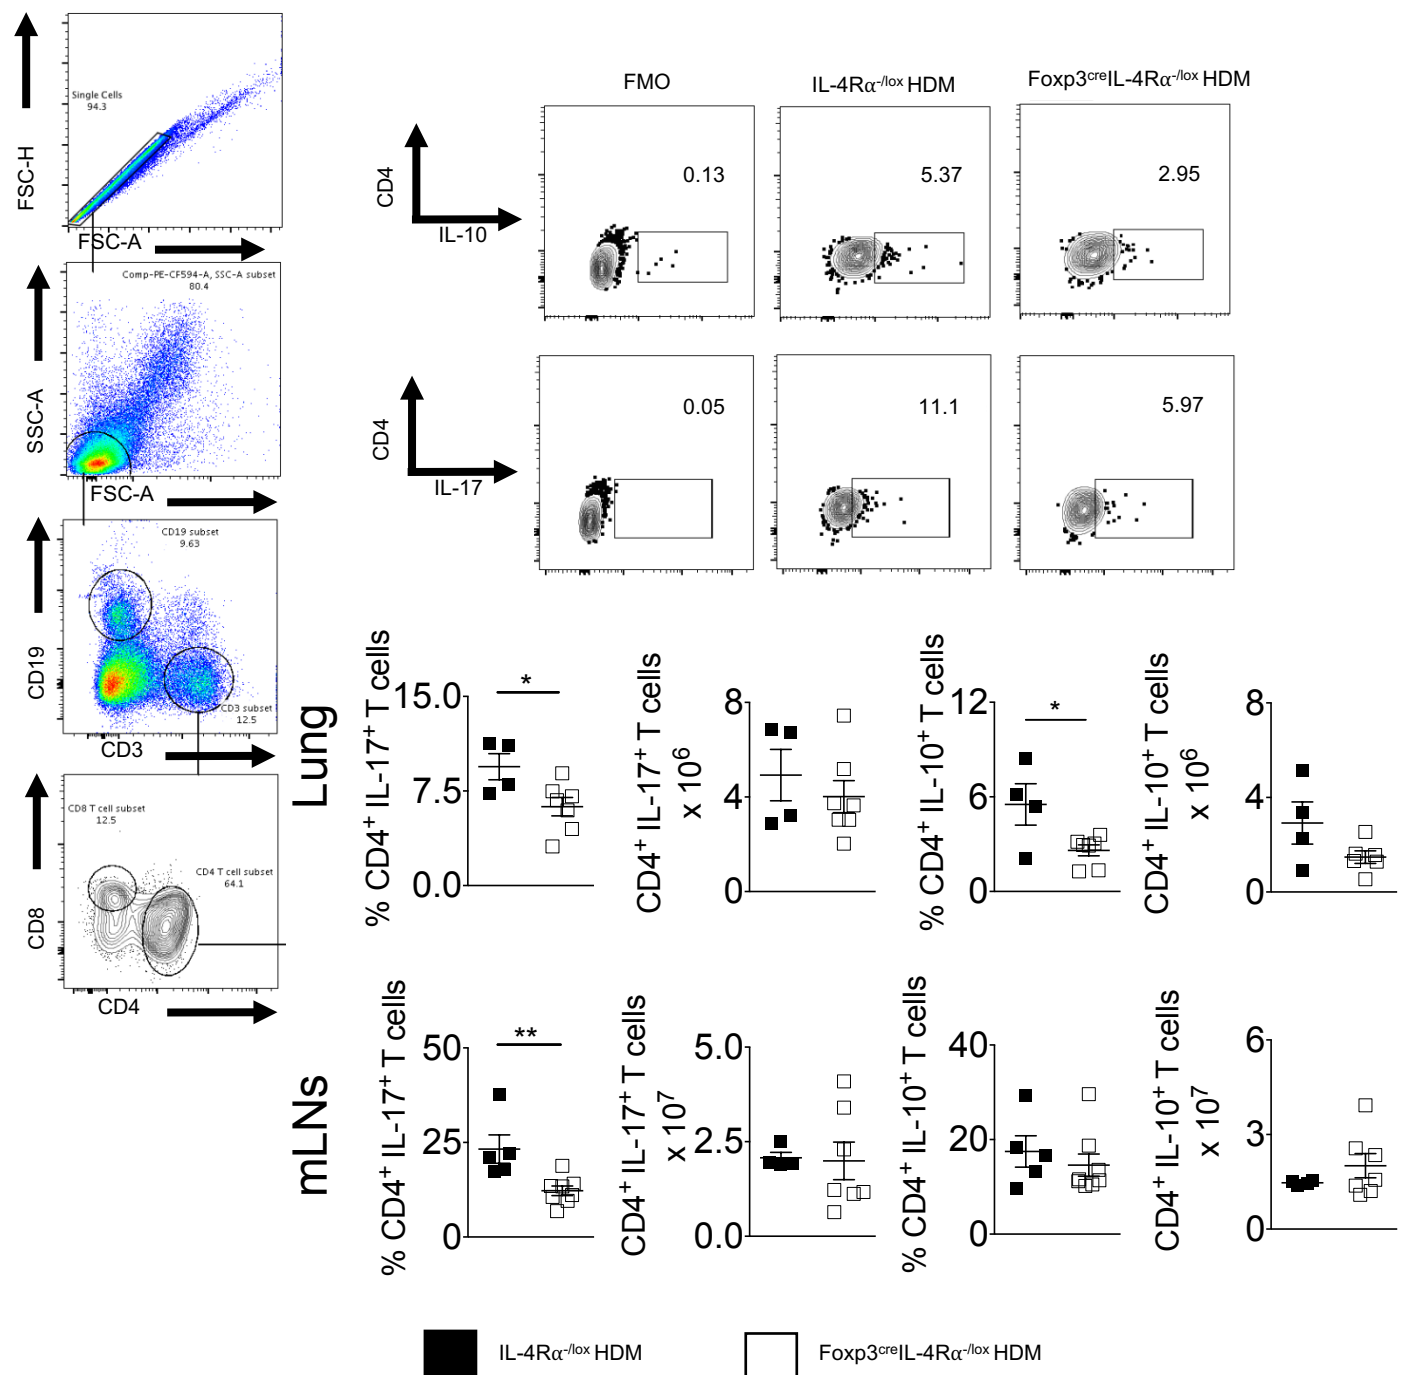

**Supplemental Figure 3. Flow cytometry plots and gating strategy for CD4<sup>+</sup> T cells producing intracellular IL-10 and IL-17 after 5 hr stimulation with PMA/ionomycin and monensin. Cellular numbers of cytokine producing CD4<sup>+</sup> T cells calculated based on percentages.**

Data shown is mean  $\pm$  SDs 1 representative experiment of 3 independent experiments (n=4-7). Significant differences between groups are represented as \*p < .05. Part of Figure 4.

A

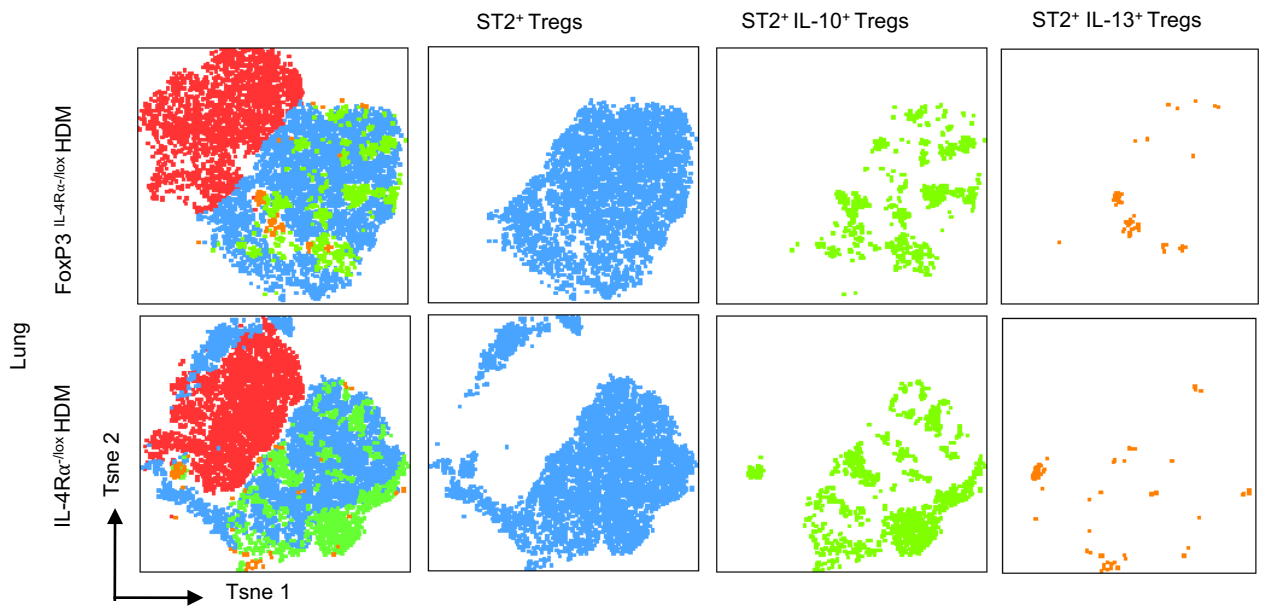

B

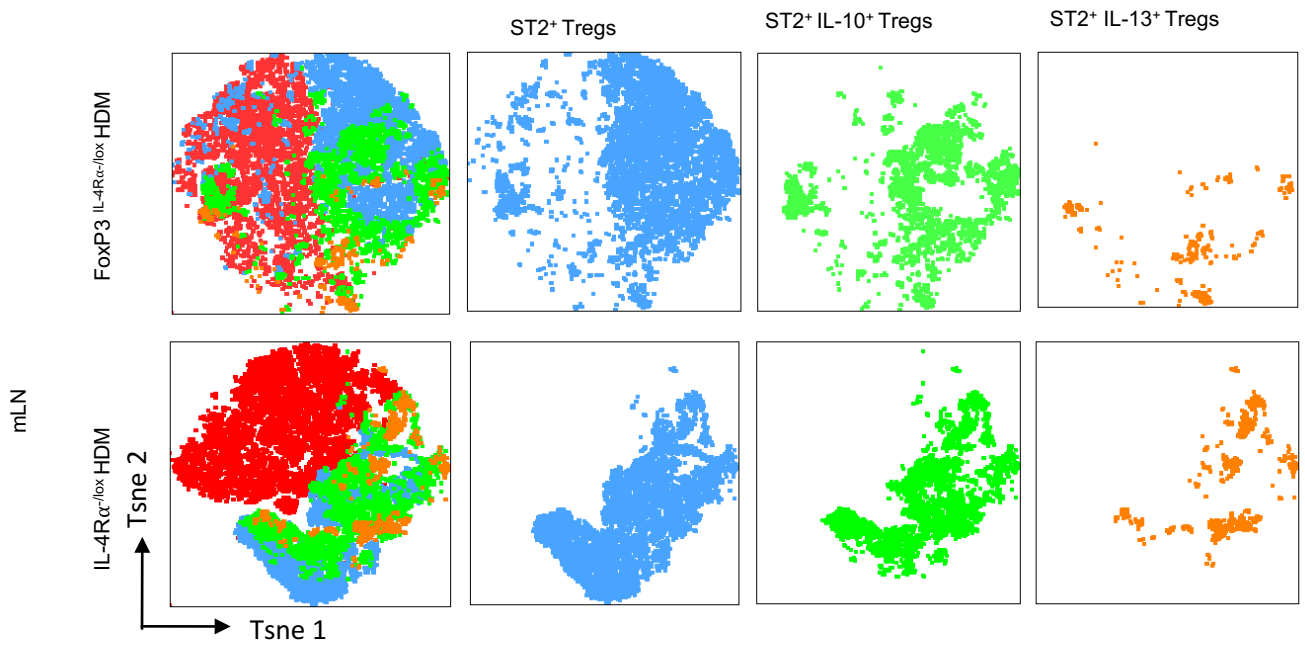

**Supplemental Figure 4. tSNE dimensional analysis for the CD25<sup>+</sup> FoxP3<sup>+</sup> T regulatory cell compartment**

(A) Lung and

(B) mLN.

Related to Figure 6

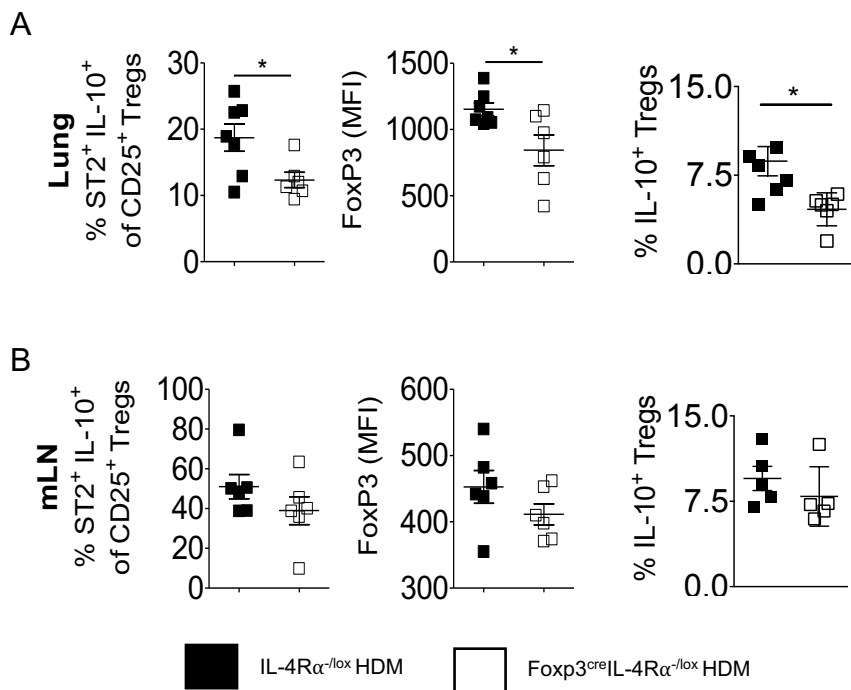

**Supplemental Figure 5:** Modulation of suppressive Treg compartment in the absence of IL-4R $\alpha$  signaling on T reg cells .

(A) % of ST2<sup>+</sup>IL-10<sup>+</sup> CD25<sup>+</sup> Treg cells (left panel), Foxp3 expression within the ST2<sup>+</sup>IL-10<sup>+</sup> CD25<sup>+</sup> Treg cells (middle panel), % IL-10 expression within CD25<sup>+</sup>ST2<sup>+</sup> Treg cells (right panel) in the lung. (B) % of ST2<sup>+</sup>IL-10<sup>+</sup> CD25<sup>+</sup> Treg cells (left panel), Foxp3 expression within the ST2<sup>+</sup>IL-10<sup>+</sup> CD25<sup>+</sup> Treg cells (middle panel), % IL-10 expression within CD25<sup>+</sup>ST2<sup>+</sup> Treg cells (right panel) in the mediastinal lymph nodes.

Data shows mean  $\pm$ SDs from 1 representative experiment of 3 independent experiments carried out (n= 5-8 per group). Significant differences are described as: \*p < .05

MFI, Median fluorescence intensity; mLNs, mediastinal lymph nodes

Figure related to Figure 6.

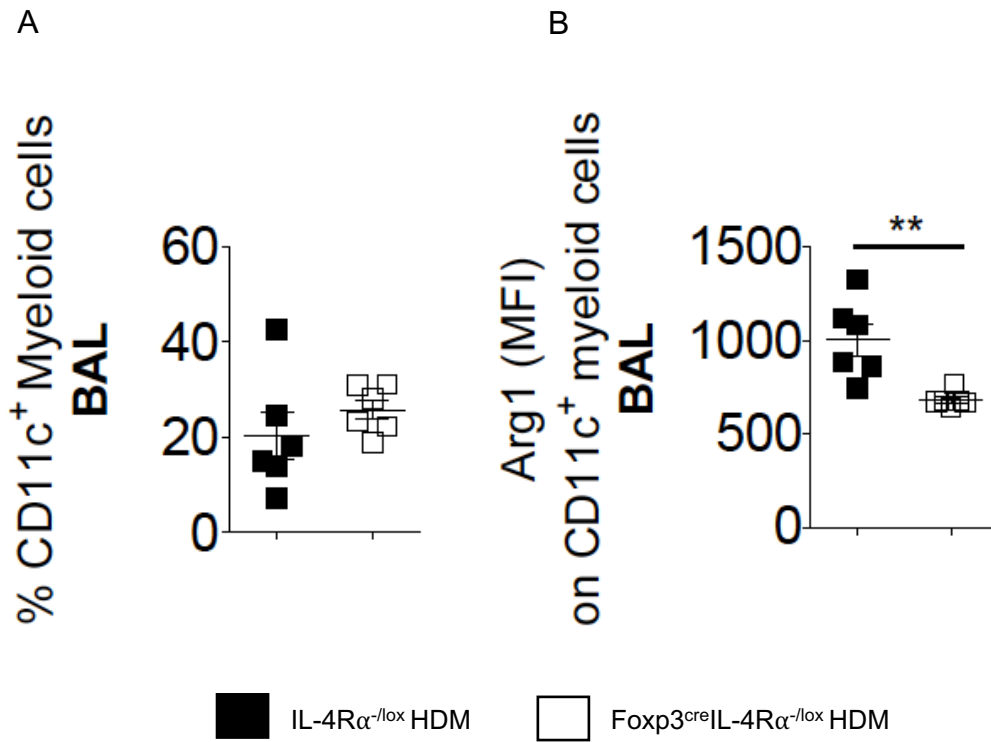

**Supplemental Figure 6:** CD11c<sup>+</sup> Myeloid cells are altered in the absence of IL-4R $\alpha$  signalling in T reg cells during HDM induced allergic asthma.

(A) Proportions of CD11c<sup>+</sup> myeloid cells in BAL.

(B) Expression of arginase 1 on CD11c<sup>+</sup> myeloid cells in BAL fluid
